# Supplementary material
Source: PubMed Central journal article supplement (PMC5500134)
Supplement: 1339FileS1.pdf [file 1339FileS1.pdf]

## Supplemental Materials

### Supplemental Methods

#### *In Vitro* Nucleosome Stability Assay

The stability of H2A-H2B binding to the nucleosome was measured by Förster Resonance Energy Transfer (FRET) assay during NaCl-induced dissociation, as previously described (HOCH *et al.* 2007). Briefly, NCPs were reconstituted by salt dialysis using the 149mer 601 DNA positioning sequence and purified *Xenopus* histone proteins including WT H2B or the H2B-L103A mutant. Assays were conducted at 100 nM NCP using H4-V60W as the FRET donor and H2A-L108C-AEDANS as the FRET acceptor in FRET reaction buffer (20 mM Tris-Cl, pH 7.6; 0.1 mM EDTA, 0.1 mM β-mercaptoethanol) at 25 °C in varying salt concentrations.

Figure S1

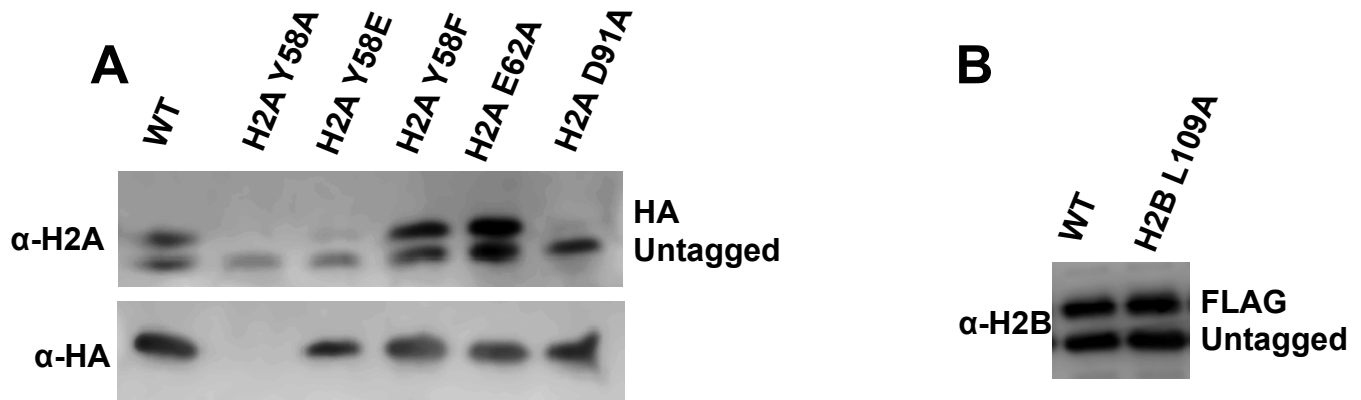

**Figure S1.** Analysis of expression of mutant histones by Western blot of yeast whole cell extracts. In all cases, an untagged wild type histone was co-expressed. (A) HA-tagged essential histone mutants analyzed with both the H2A (upper panel) and HA (lower panel) antibodies (B) FLAG-tagged H2B L109A analyzed using the anti-H2B antibody.

Figure S2

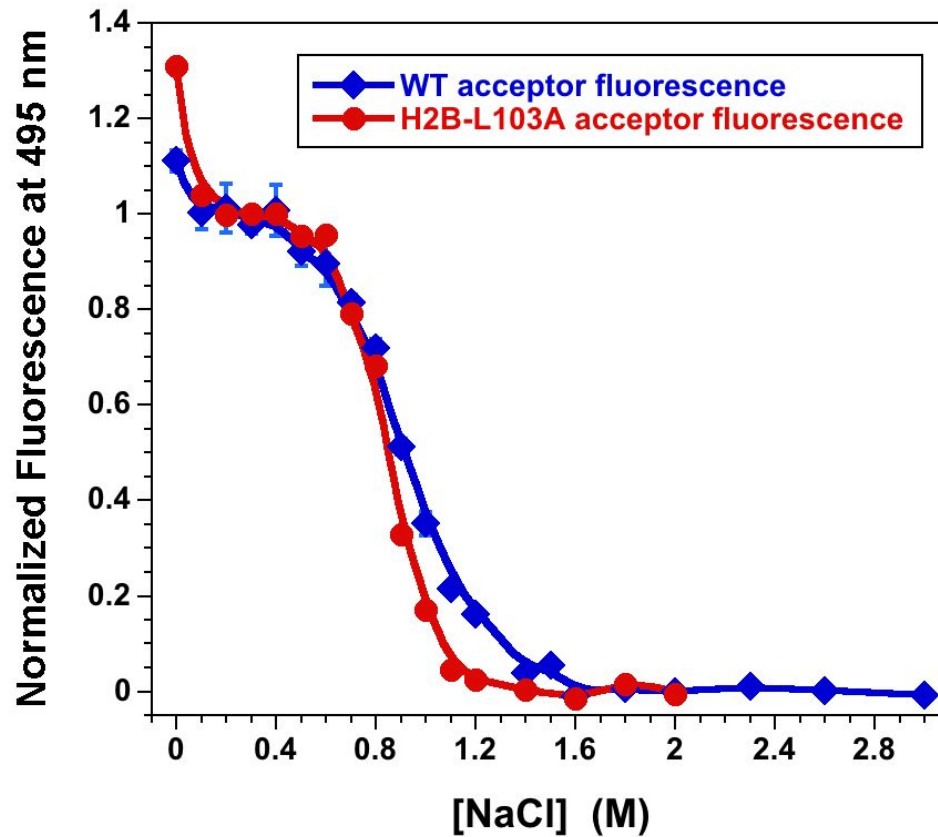

**Figure S2.** The *Xenopus* H2B L103A mutant (homologous to yeast H2B L109A) has only a minor effect on nucleosome stability *in vitro*. FRET analysis of the salt stability of *Xenopus* H2B L103A-containing nucleosomes. Fluorescence of the H2A-L108C-AEDANs acceptor was monitored at indicated salt concentrations for 100nM of WT or H2B L103A-containing NCPs. Error bars are shown or are equal or smaller than the size of the data points.

Figure S3

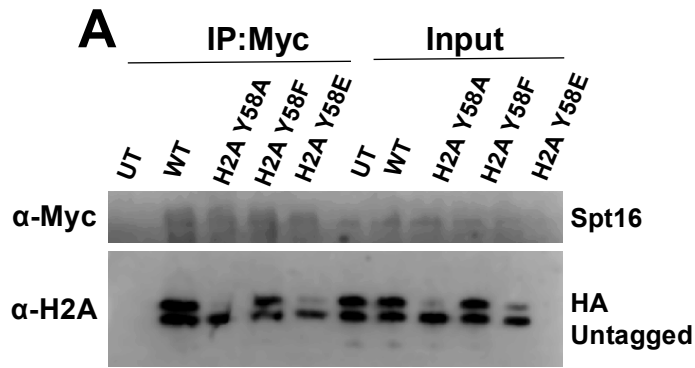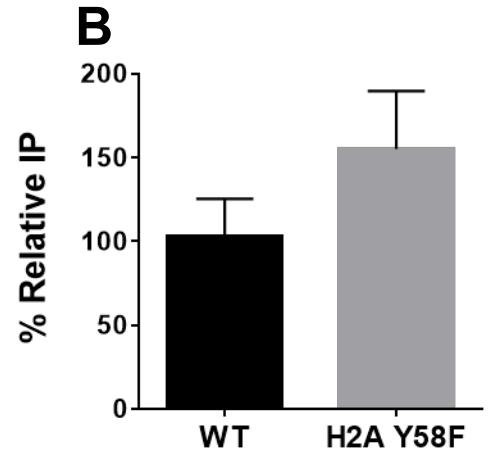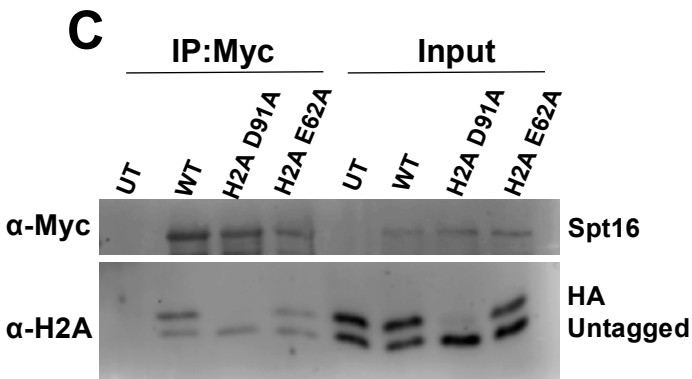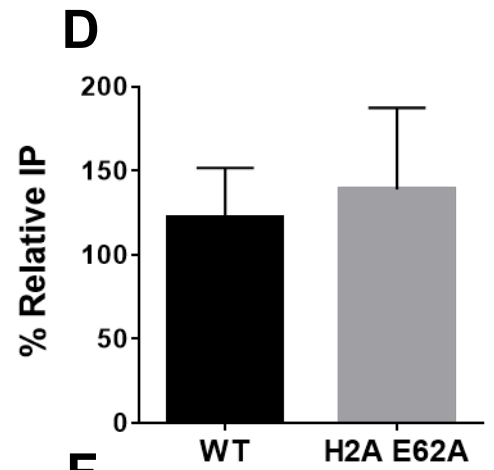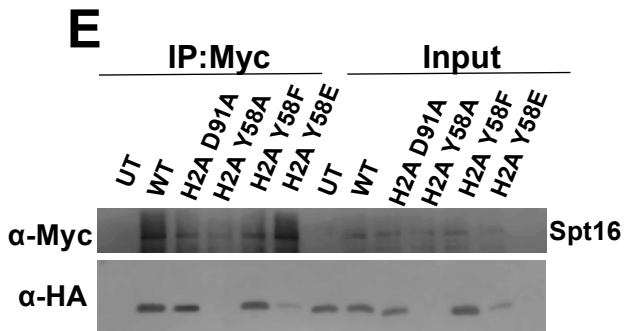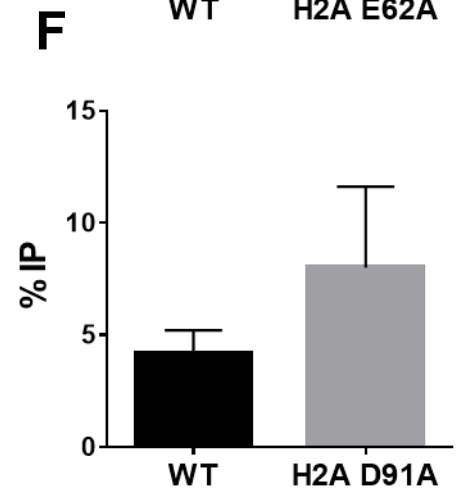

**Figure S3.** Other essential acidic patch residues are not important for binding FACT.

Co-IP analysis using anti-Myc beads of nuclease treated yeast whole cell extracts

containing Spt16-Myc and HA-tagged (A-B) H2A Y58A/F/E with the H2A antibody (C-D)

E62A with the H2A antibody (E-F) H2A D91A and Y58A/F/E with the HA antibody.

(B,D,F) Quantification of the % IP of the tagged band relative to the untagged band.

Graphs represent the mean and SEM of at least 3 independent replicate experiments.

**Figure S4**

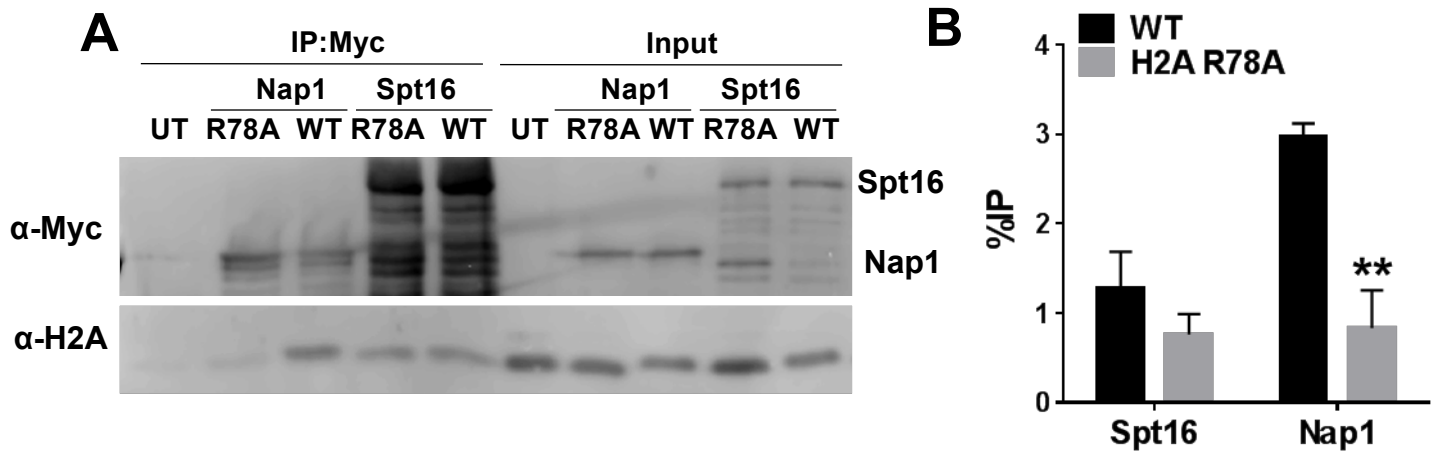

**Figure S4.** Analysis of FACT and Nap1 binding to H2A R78A expressed as the only histone copy. Co-IP analysis was conducted using anti-Myc beads and Spt16-Myc or Nap1-Myc in the absence of nuclease. Quantification of the % IP representing the mean and SEM of at least 3 independent replicates. \*\*P  $\leq$  0.01

Figure S5

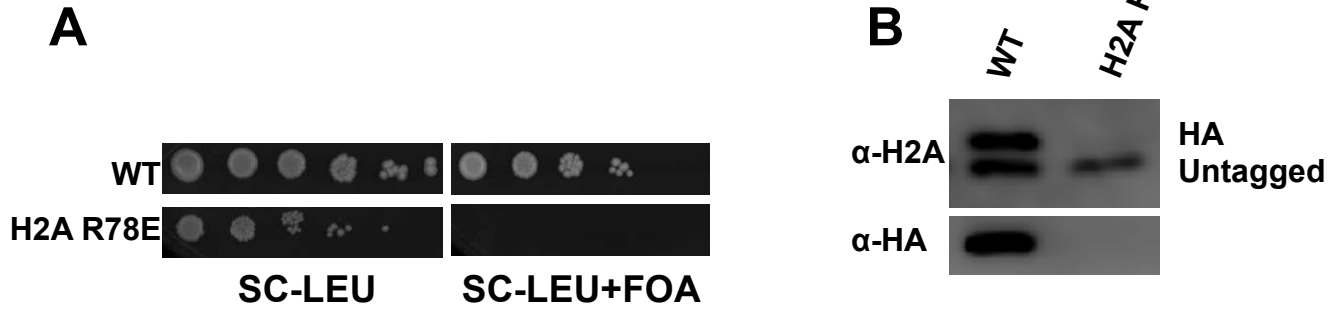

**Figure S5.** (A) H2A R78E mutant is lethal in yeast. H2A R78E was expressed on a *LEU2* plasmid and wild type histones were expressed on a *URA3* plasmid that was shuffled out by FOA selection. (B) HA-tagged H2A R78E mutant analyzed using both anti-H2A (upper panel) and anti-HA (lower panel) antibodies. An untagged wild type H2A is co-expressed.

**Figure S6**

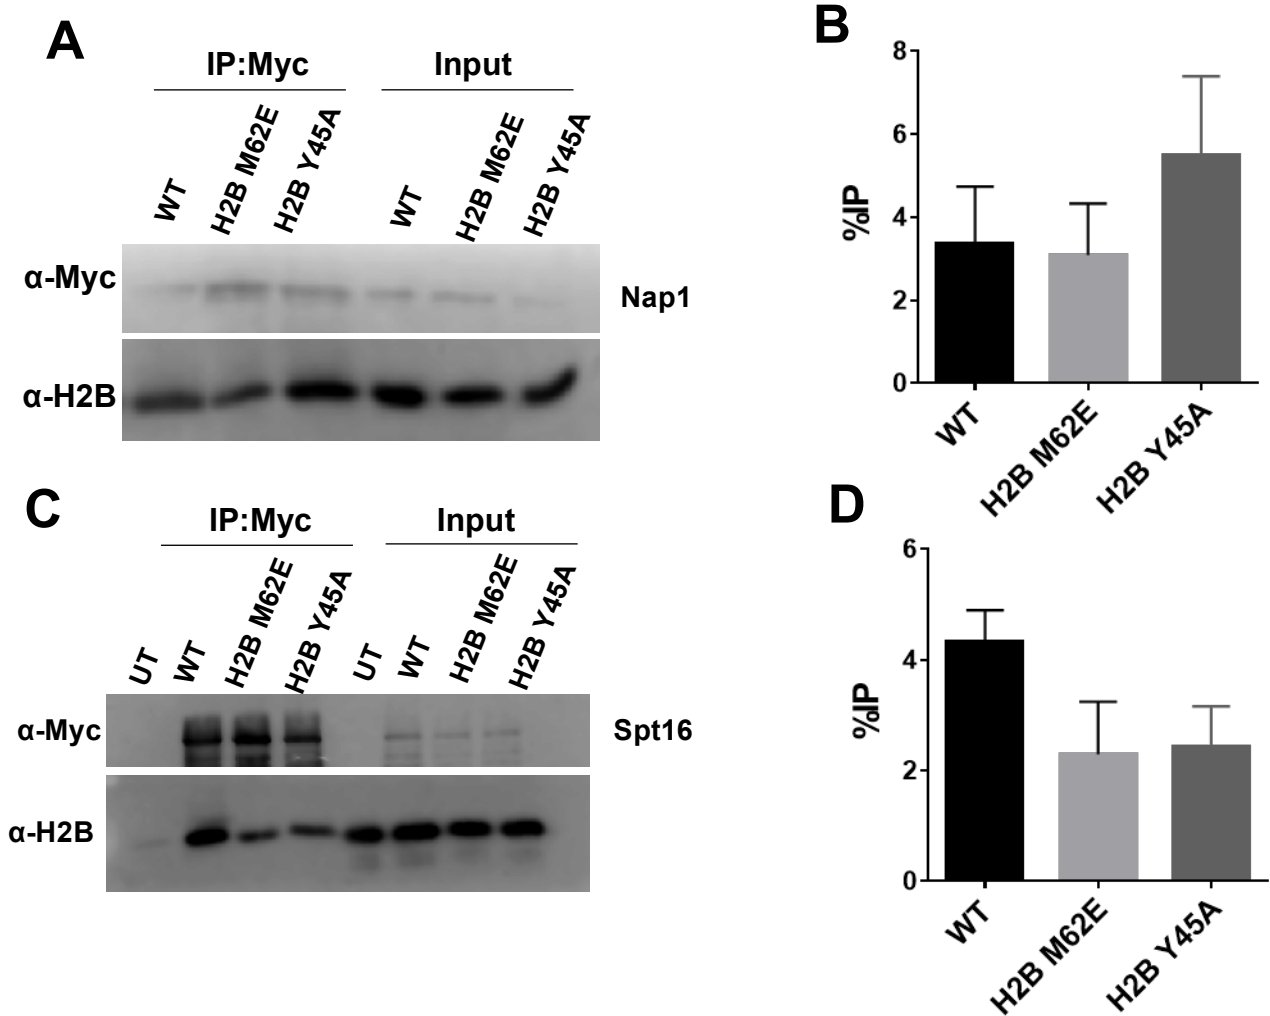

**Figure S6.** Analysis of FACT and Nap1 binding to H2B M62E and Y45A mutants when expressed as the only histone copy. Co-IP analysis with anti-Myc beads was conducted using Nap1-Myc (A-B) and using Spt16-Myc following nuclease treatment (C-D). Quantification of the % IP representing the mean and SEM of at least 3 independent replicates.



**Table S1. Yeast Strains Used in This Study**

| <b>Strain Name</b>                       | <b>Genotype</b>                                                                                                                      | <b>Figure(s)</b> |
|------------------------------------------|--------------------------------------------------------------------------------------------------------------------------------------|------------------|
| WY500* (WT)                              | <i>MATa his3-1 leu2-0 met15-0 ura3-0 hht1-hhf1::KAN hhf2-hht2::NAT hta1-htb1::HPH hta2-htb2::NAT p[CEN URA3 HTA1-HTB1-HHT2-HHF2]</i> |                  |
| YT01 (H2A D91A)                          | Isogenic to WY500; also includes p[CEN LEU2 <i>hta1_D91A-HTB1-HHT2-HHF2</i> ]                                                        | 1                |
| YT02 (H2A E62A)                          | Isogenic to WY500; also includes p[CEN LEU2 <i>hta1_E62A-HTB1-HHT2-HHF2</i> ]                                                        | 1                |
| YAH053 (HA-H2A Y58A)                     | Isogenic to WY500; also includes p[CEN LEU2 <i>hta1_HA Y58A-HTB1-HHT2-HHF2</i> ]                                                     | 1,S1             |
| YT03 (H2B L109A)                         | Isogenic to WY500; also includes p[CEN LEU2 <i>HTA1-htb1_L109A-HHT2-HHF2</i> ]                                                       | 1                |
| YAH059 (HA-H2A Y58F)                     | Isogenic to WY500; also includes p[CEN LEU2 <i>hta1_HA Y58F-HTB1-HHT2-HHF2</i> ]                                                     | 1, S1            |
| YAH060 (HA-H2A Y58E)                     | Isogenic to WY500; also includes p[CEN LEU2 <i>hta1_HA Y58E-HTB1-HHT2-HHF2</i> ]                                                     | 1, S1            |
| WY471.500<br>(WT Gal Shutdown WT)        | Isogenic to WY500; URA plasmid replaced with p[CEN HIS3 HTA1-pGAL-HTB1-HHT2-HHF2] p[CEN LEU2 HTA1-HTB1-HHT2-HHF2]                    | 1                |
| WY471.1<br>(WT Gal Shutdown ΔL1)         | Isogenic to WY500; URA plasmid replaced with p[CEN HIS3 HTA1-pGAL-HTB1-HHT2-HHF2] p[CEN LEU2 <i>hta1_Δ39-42-HTB1-HHT2-HHF2</i> ]     | 1                |
| WY471.3<br>(WT Gal Shutdown Leu2)        | Isogenic to WY500; URA plasmid replaced with p[CEN HIS3 HTA1-pGAL-HTB1-HHT2-HHF2] p[CEN LEU2]                                        | 1                |
| WY471.pT01<br>(WT Gal Shutdown H2A D91A) | Isogenic to WY500; URA plasmid replaced with p[CEN HIS3 HTA1-pGAL-HTB1-HHT2-HHF2] p[CEN LEU2 <i>hta1_D91A-HTB1-HHT2-HHF2</i> ]       | 1                |
| WY471.pT02 (WT Gal Shutdown H2A E62A)    | Isogenic to WY500; URA plasmid replaced with p[CEN HIS3 HTA1-pGAL-HTB1-HHT2-HHF2] p[CEN LEU2 <i>hta1_E62A-HTB1-HHT2-HHF2</i> ]       | 1                |
| WY471.pT03 (WT Gal Shutdown H2B L109A)   | Isogenic to WY500; URA plasmid replaced with p[CEN HIS3 HTA1-pGAL-HTB1-HHT2-HHF2] p[CEN LEU2 HTA1- <i>htb1_L109A-HHT2-HHF2</i> ]     | 1                |
| WY471.pT016 (WT Gal Shutdown H2A Y58A)   | Isogenic to WY500; URA plasmid replaced with p[CEN HIS3 HTA1-pGAL-HTB1-HHT2-HHF2] p[CEN LEU2 <i>hta1_Y58A-HTB1-HHT2-HHF2</i> ]       | 1                |
| YT09<br>(Untagged ChIP control)          | Isogenic to WY500; URA plasmid replaced with p[CEN LEU2 HTA1-HTB1-HHT2-HHF2] p[CEN URA3 HTA1-HTB1-HHT2-HHF2]                         | 1                |
| YAH002<br>(Untagged WT FLAG-H2B L109A)   | Isogenic to WY500; URA plasmid replaced with p[CEN LEU2 HTA1-HTB1-HHT2-HHF2] p[CEN URA3 HTA1- <i>htb1_L109A_FLAG-HHT2-HHF2</i> ]     | 1, S5            |
| YAH050<br>(Untagged WT; HA-H2A)          | Isogenic to WY500; also includes p[CEN LEU2 <i>hta1_HA-HTB1-HHT2-HHF2</i> ]                                                          | 1,3,4,S1, S3     |
| YAH051<br>(Untagged WT; HA-H2A)          | Isogenic to WY500; also includes p[CEN LEU2 <i>hta1_D91A_HA-HTB1-HHT2-HHF2</i> ]                                                     | 1,3,4,S1, S3     |

|                                          |                                                                                                                               |           |
|------------------------------------------|-------------------------------------------------------------------------------------------------------------------------------|-----------|
| D91A)                                    |                                                                                                                               |           |
| YAH094<br>(Spt16-Myc; HA-H2A<br>R78E+wt) | Isogenic to LT100; also includes p[CEN LEU2 hta1-<br>_R78E_HA-HTB1-HHT2-HHF2]                                                 | 1,S5      |
| YAH001<br>(Untagged WT FLAG-H2B)         | Isogenic to WY500; URA plasmid replaced with<br>p[CEN LEU2 HTA1-HTB1-HHT2-HHF2] p[CEN<br>URA3 HTA1-htb1_FLAG-HHT2-HHF2]       | 1,2,4     |
| WY504 (WT)                               | Isogenic to WY500; also includes p[CEN LEU2<br>HTA1-HTB1-HHT2-HHF2]                                                           | 1,5       |
| LT100<br>(Spt16-Myc)                     | Isogenic to WY500 except spt16::9xMyc::TRP1<br>trp1 <sup>+</sup> ::His3                                                       |           |
| LT101<br>(Nap1-Myc)                      | Isogenic to WY500 except nap1::9xMyc::TRP1<br>trp1 <sup>+</sup> ::His3                                                        |           |
| YAHN8<br>(Nap1-Myc; FLAG-H2B<br>L109A)   | Isogenic to LT101; URA plasmid replaced with<br>p[CEN LEU2 HTA1-HTB1-HHT2-HHF2] p[CEN<br>URA3 HTA1-htb1_L109A_FLAG-HHT2-HHF2] | 2         |
| YAHS8<br>(Spt16-Myc; FLAG-H2B<br>L109A)  | Isogenic to LT100; URA plasmid replaced with<br>p[CEN LEU2 HTA1-HTB1-HHT2-HHF2] p[CEN<br>URA3 HTA1-htb1_L109A_FLAG-HHT2-HHF2] | 2, S1     |
| YAHS103<br>(Spt16-Myc; FLAG-H2B)         | Isogenic to LT100; URA plasmid replaced with<br>p[CEN LEU2 HTA1-HTB1-HHT2-HHF2] p[CEN<br>URA3 HTA1-HTB1_FLAG-HHT2-HHF2]       | 2, S1, S6 |
| YAHN103<br>(Nap1-Myc; FLAG-H2B)          | Isogenic to LT101; URA plasmid replaced with<br>p[CEN LEU2 HTA1-HTB1-HHT2-HHF2] p[CEN<br>URA3 HTA1-HTB1_FLAG-HHT2-HHF2]       | 2, S6     |
| YAH101<br>(Spt16-Myc; HA-H2A<br>L86A+wt) | Isogenic to LT100; also includes p[CEN LEU2 hta1-<br>_L86A_HA-HTB1-HHT2-HHF2]                                                 | 3         |
| YAH098<br>(Spt16-Myc; HA-H2A<br>E57A+wt) | Isogenic to LT100; also includes p[CEN LEU2 hta1-<br>_E57A_HA-HTB1-HHT2-HHF2]                                                 | 3         |
| YAHS17<br>(Spt16-Myc; HA-H2A)            | Isogenic to LT100; also includes p[CEN LEU2<br>hta1_HA-HTB1-HHT2-HHF2]                                                        | 3,4,S3    |
| YMAP004<br>(Spt16-Myc; H2B<br>M62E+wt)   | Isogenic to LT100; also includes p[CEN LEU2 HTA1-<br>htb1_M62E_FLAG-HHT2-HHF2]                                                | 4         |
| YMAP005<br>(Spt16-Myc; H2B<br>Y45A+wt)   | Isogenic to LT100; also includes p[CEN LEU2<br>HTA1-htb1_Y45A_FLAG-HHT2-HHF2]                                                 | 4         |
| YMAP006<br>(Spt16-Myc; H2A<br>R78A+wt)   | Isogenic to LT100; also includes p[CEN LEU2 hta1-<br>_R78A_HA-HTB1-HHT2-HHF2]                                                 | 4         |
| YAP007<br>(H2A E57A, H2B M62E)           | Isogenic to WY500, also includes [CEN LEU2<br>hta1_E57A-htb1_M62E-HHT2-HHF2]                                                  | 5         |
| ML73<br>(H2A E57A)                       | Isogenic to WY500; URA plasmid replaced with<br>p[CEN LEU2 hta1_E57A-HTB1-HHT2-HHF2]                                          | 5         |
| YAH034<br>(WT Flo8-His3 Fusion)          | Isogenic to WY500 plus FLO8::HIS3; URA plasmid<br>replaced with p[CEN LEU2 HTA1-HTB1-HHT2-                                    | 5         |

|                                           |                                                                                            |        |
|-------------------------------------------|--------------------------------------------------------------------------------------------|--------|
|                                           | <i>HHF2</i> ]                                                                              |        |
| LT354.M62E<br>(H2B M62E Flo8-His3 Fusion) | Isogenic to YAH034 URA plasmid replaced with p[ <i>CEN LEU2 HTA1-htb1_M62E-HHT2-HHF2</i> ] | 5      |
| LT354.Y45A<br>(H2B Y45A Flo8-His3 Fusion) | Isogenic to YAH034 URA plasmid replaced with p[ <i>CEN LEU2 HTA1-htb1_Y45A-HHT2-HHF2</i> ] | 5      |
| LT354.E57A<br>(H2A E57A Flo8-His3 Fusion) | Isogenic to YAH034 URA plasmid replaced with p[ <i>CEN LEU2 hta1_E57A-HTB1-HHT2-HHF2</i> ] | 5      |
| YMW001<br>(Spt16-Myc; H2A M62E)           | Isogenic to LT100; URA plasmid replaced with p[ <i>CEN LEU2 HTA1-htb1_M62E-HHT2-HHF2</i> ] | 5, S6  |
| YMW003<br>(Spt16-Myc; H2A Y45A)           | Isogenic to LT100; URA plasmid replaced with p[ <i>CEN LEU2 HTA1-htb1_Y45A-HHT2-HHF2</i> ] | 5, S6  |
| YAHS22<br>(Spt16-Myc; HA-H2A Y58A)        | Isogenic to LT100; also includes p[ <i>CEN LEU2 hta1_Y58A_HA-HTB1-HHT2-HHF2</i> ]          | S1, S3 |
| YAHS24<br>(Spt16-Myc; HA-H2A Y58F)        | Isogenic to LT100; also includes p[ <i>CEN LEU2 hta1_Y58F_HA-HTB1-HHT2-HHF2</i> ]          | S1, S3 |
| YAHS25<br>(Spt16-Myc; HA-H2A Y58E)        | Isogenic to LT100; also includes p[ <i>CEN LEU2 hta1_Y58E_HA-HTB1-HHT2-HHF2</i> ]          | S1, S3 |
| YAHS20<br>(Spt16-Myc; HA-H2A D91A)        | Isogenic to LT100; also includes p[ <i>CEN LEU2 hta1_D91A_HA-HTB1-HHT2-HHF2</i> ]          | S1, S3 |
| YAHS21<br>(Spt16-Myc; HA-H2A E62A)        | Isogenic to LT100; also includes p[ <i>CEN LEU2 hta1_E62A_HA-HTB1-HHT2-HHF2</i> ]          | S1, S3 |
| YMW002<br>(Nap1-Myc; H2A M62E)            | Isogenic to LT101; URA plasmid replaced with p[ <i>CEN LEU2 HTA1-htb1_M62E-HHT2-HHF2</i> ] | S3     |
| YMW004<br>(Nap1-Myc; H2A Y45A)            | Isogenic to LT101; URA plasmid replaced with p[ <i>CEN LEU2 HTA1-htb1_Y45A-HHT2-HHF2</i> ] | S3     |
| YAH019<br>(Spt16-Myc; H2A R78A)           | Isogenic to LT100; URA plasmid replaced with p[ <i>CEN LEU2 hta1_R78A-HTB1-HHT2-HHF2</i> ] | S4     |
| YAH020<br>(Spt16-Myc; WT)                 | Isogenic to LT100; URA plasmid replaced with p[ <i>CEN LEU2 HTA1-HTB1-HHT2-HHF2</i> ]      | S4     |
| YAH023<br>(Nap1-Myc H2A; R78A)            | Isogenic to LT101; URA plasmid replaced with p[ <i>CEN LEU2 hta1_R78A-HTB1-HHT2-HHF2</i> ] | S4     |
| YAH024<br>(Nap1-Myc; WT)                  | Isogenic to LT101; URA plasmid replaced with p[ <i>CEN LEU2 HTA1-HTB1-HHT2-HHF2</i> ]      | S4     |

**Table S2. MIQE**

| Item to check                                                                                                                                                                  | Importance | Item to check                                                                                                                                                                                                                                                                                                                                                               | Importance     |
|--------------------------------------------------------------------------------------------------------------------------------------------------------------------------------|------------|-----------------------------------------------------------------------------------------------------------------------------------------------------------------------------------------------------------------------------------------------------------------------------------------------------------------------------------------------------------------------------|----------------|
| Experimental design                                                                                                                                                            |            | qPCR oligonucleotides                                                                                                                                                                                                                                                                                                                                                       |                |
| Definition of experimental and control groups<br><b>In this study, we measured the tagged mutant histones against tagged wild type histones and control untagged histones.</b> | E          | Primer sequences<br><b>PMA1</b><br>FWD:<br>GATCCACCAAGAGACGATACT<br>GCT<br>RVS:<br>ACCGCCACCTAGACCTAATCTT<br>TC<br><b>PYK1</b><br>FWD:<br>TGGTTGCTTTGAGAAAGGCTG<br>G<br>RVS:<br>TTCGTGGTTTGGTGGGATTGG<br><b>ICS2</b><br>FWD:<br>ACGTGCTACGGACGAAAAGT<br>RVS:<br>CAGGGATTATTACCTGGGACA<br>CA<br><b>GAL1</b><br>FWD:<br>GACCATTGGCCGAAAAGTGC<br>RVS:<br>ACCAGGCGATCTAGCAACAAA | E              |
| Number within each group<br><b>3 or more</b>                                                                                                                                   | E          | RTPrimerDB identification number                                                                                                                                                                                                                                                                                                                                            | D              |
| Assay carried out by the core or investigator's laboratory?<br><b>By the investigator's laboratory in the core</b>                                                             | D          | Probe sequences                                                                                                                                                                                                                                                                                                                                                             | D <sup>4</sup> |
| Acknowledgment of authors' contributions                                                                                                                                       | D          | Location and identity of any modifications<br><b>None</b>                                                                                                                                                                                                                                                                                                                   | E              |
| Sample                                                                                                                                                                         |            | Manufacturer of oligonucleotides<br><b>Invitrogen/Fisher</b>                                                                                                                                                                                                                                                                                                                | D              |
| Description<br><b>Yeast whole cell extracts</b>                                                                                                                                | E          | Purification method<br><b>Desalted</b>                                                                                                                                                                                                                                                                                                                                      | D              |
| Volume/mass of sample processed<br><b>100uL for IP, 10uL for input</b>                                                                                                         | D          | qPCR protocol                                                                                                                                                                                                                                                                                                                                                               |                |
| Microdissection or macrodissection                                                                                                                                             | E          | Complete reaction conditions<br><b>ABI 7500 FAST Quantitative <math>\Delta\Delta C_t</math></b><br>95°→(95°→60°<br>(40x))→95°→60°→95°→60°<br><br>4' 5s 30s 15s 1' 15s<br>15s                                                                                                                                                                                                | E              |
| Processing procedure                                                                                                                                                           | E          | Reaction volume and amount of                                                                                                                                                                                                                                                                                                                                               | E              |

| Item to check                                                                                                                                                                                                                                           | Importance | Item to check                                                                                                                                                       | Importance |
|---------------------------------------------------------------------------------------------------------------------------------------------------------------------------------------------------------------------------------------------------------|------------|---------------------------------------------------------------------------------------------------------------------------------------------------------------------|------------|
| Following formaldehyde crosslinking, yeast cells were spun down, lysed by bead beating, sonicated, and IP'ed using FLAG antibody. Extracts were proteinase K digested, crosslinking was reversed, and DNA extracted by PCI followed by RNaseA digestion |            | cDNA/DNA<br><b>ddH<sub>2</sub>O</b> <b>2.05μL</b><br><b>Eva Green</b> <b>7.50μL</b><br><b>10x Rox</b> <b>0.45μL</b><br><b>DNA</b> <b>2μL</b>                        |            |
| If frozen, how and how quickly?<br>Extracts were frozen at -80° by placing in the freezer                                                                                                                                                               | E          | Primer, (probe), Mg <sup>2+</sup> , and dNTP concentrations<br><b>Primer: 0.5mM</b><br><b>The rest as in commercial Eva Green Mastermix (Biotium)</b>               | E          |
| If fixed, with what and how quickly?<br><b>1% Formaldehyde for 15 minutes</b>                                                                                                                                                                           | E          | Polymerase identity and concentration<br><b>Cheetah hot-start Taq polymerase</b>                                                                                    | E          |
| Sample storage conditions and duration (especially for FFPE <sup>2</sup> samples)<br><b>Yeast pellets and extracts were stored at -80°</b>                                                                                                              | E          | Buffer/kit identity and manufacturer<br><b>Fast Eva Green qPCR Master Mix; Biotium</b>                                                                              | E          |
| Nucleic acid extraction<br><b>PCI</b>                                                                                                                                                                                                                   |            | Exact chemical composition of the buffer                                                                                                                            | D          |
| Procedure and/or instrumentation<br><b>ABI 7500 FAST Quantitative ΔΔCt</b><br>95°→(95°→60°(40x))→95°→60°→95°→60°<br><br>4'    5s    30s    15s    1'    15s    15s                                                                                      | E          | Additives (SYBR Green I, DMSO, and so forth)<br><b>10x ROX</b>                                                                                                      | E          |
| Name of kit and details of any modifications<br><b>Fast Eva Green qPCR Master Mix +0.3x Rox; Biotium</b>                                                                                                                                                | E          | Manufacturer of plates/tubes and catalog number<br><b>96-well plates from Fisher Scientific Cat# AB-1900</b>                                                        | D          |
| Source of additional reagents used<br><b>N/A</b>                                                                                                                                                                                                        | D          | Complete thermocycling parameters<br><b>ABI 7500 FAST Quantitative ΔΔCt</b><br>95°→(95°→60°(40x))→95°→60°→95°→60°<br><br>4'    5s    30s    15s    1'    15s    15s | E          |
| Details of DNase or RNase treatment<br><b>Samples were treated with 0.33mg/mL RNaseA at 37° for 15-20 minutes</b>                                                                                                                                       | E          | Reaction setup (manual/robotic)<br><b>Manual</b>                                                                                                                    | D          |
| Contamination assessment (DNA or RNA)<br><b>RNA is not visible following treatment on agarose gel</b>                                                                                                                                                   | E          | Manufacturer of qPCR instrument<br><b>ABI 7500 fast from Applied Biosystems</b>                                                                                     | E          |
| Nucleic acid quantification<br><b>~10-100ng/uL for IP, ~250-350ng/uL for input</b>                                                                                                                                                                      | E          | qPCR validation                                                                                                                                                     |            |

| Item to check                                                                                                                                             | Importance     | Item to check                                                                                       | Importance |
|-----------------------------------------------------------------------------------------------------------------------------------------------------------|----------------|-----------------------------------------------------------------------------------------------------|------------|
| Instrument and method<br><b>ABI 7500 FAST Quantitative <math>\Delta\Delta Ct</math></b><br>95°→95°→60°→95°→60°→95°<br>→60°<br>4' 5s 30s 15s 1' 15s<br>15s | E              | Evidence of optimization (from gradients)                                                           | D          |
| Purity ( $A_{260}/A_{280}$ )                                                                                                                              | D              | Specificity (gel, sequence, melt, or digest)<br><br><b>Melt Curve</b>                               | E          |
| Yield<br><b>~10-100ng/uL for IP, ~250-350ng/uL for input</b>                                                                                              | D              | For SYBR Green I, $C_q$ of the NTC<br><b>NTC fails to amplify</b>                                   | E          |
| RNA integrity: method/instrument<br><b>N/A</b>                                                                                                            | E              | Calibration curves with slope and y intercept<br><b>Slope:-3.379</b><br><b>Y intercept: 41.19</b>   | E          |
| RIN/RQI or $C_q$ of 3' and 5' transcripts<br><b>N/A</b>                                                                                                   | E              | PCR efficiency calculated from slope<br><b>&gt;97.676%</b>                                          | E          |
| Electrophoresis traces<br><b>RNA is not visible on agarose gel</b>                                                                                        | D              | CIs for PCR efficiency or SE                                                                        | D          |
| Inhibition testing ( $C_q$ dilutions, spike, or other)<br><b><math>C_q</math> dilutions</b>                                                               | E              | $r^2$ of calibration curve<br><b>0.995</b>                                                          | E          |
| Reverse transcription<br><b>N/A</b>                                                                                                                       |                | Linear dynamic range<br><b>9 logs</b>                                                               | E          |
| Complete reaction conditions                                                                                                                              | E              | $C_q$ variation at LOD<br><b>Average SD of <math>C_q</math> for duplicate reactions 0.07 cycles</b> | E          |
| Amount of RNA and reaction volume                                                                                                                         | E              | CIs throughout range                                                                                | D          |
| Priming oligonucleotide (if using GSP) and concentration                                                                                                  | E              | Evidence for LOD<br><b>Amplification detected in 100% of input samples</b>                          | E          |
| Reverse transcriptase and concentration                                                                                                                   | E              | If multiplex, efficiency and LOD of each assay<br><b>N/A</b>                                        | E          |
| Temperature and time                                                                                                                                      | E              | Data analysis                                                                                       |            |
| Manufacturer of reagents and catalogue numbers                                                                                                            | D              | qPCR analysis program (source, version)<br><b>ABI 7500 Software</b>                                 | E          |
| $C_q$ s with and without reverse transcription                                                                                                            | D <sup>3</sup> | Method of $C_q$ determination<br><b><math>\Delta\Delta Ct</math></b>                                | E          |
| Storage conditions of cDNA                                                                                                                                | D              | Outlier identification and disposition<br><b>Data was not excluded</b>                              | E          |
| qPCR target information                                                                                                                                   |                | Results for NTCs<br><b>No amplification</b>                                                         | E          |
| Gene symbol                                                                                                                                               | E              | Justification of number and                                                                         | E          |

| Item to check                                                                                                                                                  | Importance | Item to check                                                                                                           | Importance |
|----------------------------------------------------------------------------------------------------------------------------------------------------------------|------------|-------------------------------------------------------------------------------------------------------------------------|------------|
| <b>PMA1</b><br><b>PYK1</b><br><b>ICS2</b><br><b>GAL1</b>                                                                                                       |            | choice of reference genes<br><b>NA</b>                                                                                  |            |
| Sequence accession number<br><b>NA</b>                                                                                                                         | E          | Description of normalization method<br><b>%IP/Input</b>                                                                 | E          |
| Location of amplicon<br><b>PMA1</b> chrVII:480900-481067<br><b>PYK1</b> chrI:71895+72109<br><b>ICS2</b> chrII:554899+555019<br><b>GAL1</b> chrII:279088+279176 | D          | Number and concordance of biological replicates<br><b>At least 3</b>                                                    | D          |
| Amplicon length<br><b>PMA1 168bp</b><br><b>PYK1 215bp</b><br><b>ICS2 121bp</b><br><b>GAL1 89bp</b>                                                             | E          | Number and stage (reverse transcription or qPCR) of technical replicates<br><b>2 technical replicates on qPCR plate</b> | E          |
| In silico specificity screen (BLAST, and so on)<br><b>BLAST</b>                                                                                                | E          | Repeatability (intraassay variation)<br><b>SD =0.02-0.2 cycles</b>                                                      | E          |
| Pseudogenes, retropseudogenes, or other homologs?<br><b>No</b>                                                                                                 | D          | Reproducibility (interassay variation, CV)                                                                              | D          |
| Sequence alignment<br><b>NA</b>                                                                                                                                | D          | Power analysis<br><b>NA</b>                                                                                             | D          |
| Secondary structure analysis of amplicon<br><b>NA</b>                                                                                                          | D          | Statistical methods for results significance<br><b>t-test</b>                                                           | E          |
| Location of each primer by exon or intron (if applicable)<br><b>NA</b>                                                                                         | E          | Software (source, version)<br><b>Graphpad Prism 6</b>                                                                   | E          |

**Supplemental References:**

HOCH, D. A., J. J. STRATTON and L. M. GLOSS, 2007 Protein-protein Forster resonance energy transfer analysis of nucleosome core particles containing H2A and H2A.Z. *J Mol Biol* **371**: 971-988.
